1           **Longitudinal changes in the prevalence and intensity of soil-transmitted helminth infection**  
2           **following expanded community-wide mass drug administration in the delta region of Myanmar**

3

4   Julia C Dunn<sup>1,2\*</sup>, Alison A Bettis<sup>1,2</sup>, Nay Yee Wyine<sup>2</sup>, Aye Moe Moe Lwin<sup>3</sup>, Aung Tun<sup>4</sup>, Nay Soe Maung<sup>3</sup>  
5   and Roy M Anderson<sup>1,2</sup>

6

7   <sup>1</sup>Department of Infectious Disease Epidemiology, School of Public Health, Faculty of Medicine,  
8   Imperial College London, London W2 1PG, UK

9   <sup>2</sup>London Centre for Neglected Tropical Disease Research, London, UK

10   <sup>3</sup>University of Public Health, Myorma Kyaung Street, Yangon 11131, Myanmar,

11   <sup>4</sup>Ministry of Health and Sports, Nyapyitaw, Myanmar

12

13   \* Corresponding author

14   E-mail: [julia.dunn@imperial.ac.uk](mailto:julia.dunn@imperial.ac.uk)

15 **Abstract:**

16 Mass drug administration (MDA), targeted at school-aged children is the method recommended by  
17 the World Health Organization for the control of morbidity induced by soil-transmitted helminth  
18 (STH) infection in endemic countries. However, MDA does not prevent reinfection between  
19 treatment rounds. In countries with endemic infection, such as Myanmar, the MDA coverage, who is  
20 targeted, and rates of reinfection in given environmental and social settings will determine how  
21 effective mass drug treatment is in suppressing transmission in the long-term. In this paper, data  
22 from an epidemiology study on STH, conducted between June 2015 and June 2016 in the delta  
23 region of Myanmar, are analysed to determine the risks of STH infection in the whole community  
24 over a year which included two MDA rounds. Risk ratios (RRs) for the four-month reinfection period  
25 were below one, whereas RRs for the six-month reinfection period were above one, indicating that  
26 more people were infected after six months of exposure post-MDA. Evidence of predisposition, as  
27 measured by the Kendall Tau-b statistic, was found for all STH species and across all age groups. This  
28 study demonstrates that a six-month gap between MDA in these communities is enough time for  
29 STH infection to return to pre-MDA levels and that the same individuals are being consistently  
30 infected between MDA rounds.

31 **Author summary:**

32 Mass drug administration (MDA), treating either whole communities or targeted groups without a  
33 prior diagnosis, is used as a control strategy for many neglected tropical diseases, including soil-  
34 transmitted helminth (STH) infection. MDA takes place at set intervals, aiming to reduce morbidity  
35 caused by the target disease and potentially interrupt transmission. In this study we measure STH  
36 infection in two villages in the delta region of Myanmar over the course of a year, both before and  
37 after MDA rounds, to quantify the effect of treatment on infection and to identify groups with  
38 persistent infections. We found that whilst overall prevalence of STH infection decreased over the  
39 year, intensity of infection, measured by eggs per gram of faeces, did not significantly decrease. We

40 also found evidence to suggest that particular people are predisposed to STH infection. This is  
41 possibly due to non-compliance to MDA, or behavioural and social factors. The findings presented  
42 here will provide evidence to support continuing Myanmar's MDA programme for STH control and  
43 using accurate diagnostics to identify and target "predisposed" people for sustained treatment.

#### 44 **Introduction:**

45 Soil-transmitted helminth infections (STHs) are classified by the World Health Organization (WHO) as  
46 neglected tropical diseases (NTDs). Approximately 1.4 billion people worldwide are estimated to be  
47 infected with at least one of the main STHs (*Ascaris lumbricoides*, *Trichuris trichiura*, *Ancylostoma*  
48 *duodenale*, *Necator americanus*) (1). Endemic countries carry out mass drug administration (MDA)  
49 campaigns to control STH infections with the goals of reducing STH prevalence and intensity of  
50 infection to a level where there is a low risk of morbidity in children (2,3). The WHO recommends  
51 that MDA is carried out annually or biannually, targeting school-aged children (SAC, 5-14 years old)  
52 as they are at the highest risk of morbidity (3,4). In 2017, this guideline was updated to include  
53 treatment of young children (12 to 23 months old), preschool-aged children (pre-SAC, 2-4 year olds),  
54 adolescent girls (10-19 year olds) and women of reproductive age (WRA, 15-45 year olds) (3).  
55 Myanmar, in Southeast Asia, has conducted pre-SAC and SAC targeted MDA with albendazole every  
56 August since 2003 and reported high coverage levels. For example, national coverage of SAC was  
57 reported as 97.49% in 2016 (5,6). However, contrary to the usual WHO definitions of SAC (5-14 years  
58 old (4)), the STH MDA campaigns in Myanmar only treats pre-SAC and primary school children (5-9  
59 year olds) (5). A community-wide MDA with diethylcarbamazine citrate (DEC) and albendazole is  
60 carried out by the Global Programme to Eliminate Lymphatic Filariasis (GPELF) in December or  
61 January of each year (7). Therefore, children 2-9 years old get treated with albendazole biannually  
62 whereas anyone 10 years and over get treated with albendazole annually. Whilst intensity of STH  
63 has decreased to low levels since MDA began, prevalence is still too high to consider halting the  
64 MDA programme (5,8,9).

65 The purpose of preventive chemotherapy is to clear STH infections from humans, but it does not  
66 prevent reinfection between MDA rounds since gut dwelling helminth parasites do not trigger strong  
67 acquired immunity in the human host (10). Research into drug efficacy also suggests that a single  
68 dose of albendazole, as given in most countries' MDA programmes, will not completely clear  
69 intestinal helminth parasites, especially *T. trichiura* infections (11–14). Therefore, as well as  
70 individuals gaining new infections after MDA, they may also be harbouring old infections not killed  
71 by previous treatment. Reinfection, or the change in STH prevalence and intensity over time,  
72 depends on multiple factors: the efficacy of the anthelmintics and coverage of MDA to effectively  
73 clear STH infections from all infected individuals in the population, the level of environmental  
74 contamination with eggs and larvae and an individuals' exposure to environmental contamination  
75 (behavioural and social factors) (15).

76 Those who are consistently reinfected with STH after clearing their infections with treatment are  
77 considered to be “predisposed” to infection (16). Research is ongoing to determine what the  
78 underlying factors of predisposition are. They are likely to be a combination of genetic,  
79 immunological, environmental and behavioural factors (17–19). Predisposition is usually defined as  
80 individuals who consistently reacquire infection to the same intensity class of infection (i.e. low,  
81 medium, high) as prior to treatment (20). However, in low STH intensity populations, such as those  
82 that have undergone multiple years of MDA, the definition of predisposition could be widened to  
83 include all those who consistently harbour positive STH infections between MDA rounds. Being able  
84 to identify the groups of people that are consistently infected, despite MDA, would be highly  
85 beneficial to STH control programmes that are in the final years of MDA and are targeting the  
86 interruption of transmission (21,22). A change in treatment policy may be desirable to target those  
87 predisposed to infection if they can easily be identified.

88 In this paper we describe and analyse the longitudinal infection profiles of participants in an  
89 epidemiology study of STH in Myanmar that was conducted between June 2015 and June 2016. The

90 aim of this analysis is to determine how infection fluctuates over the course of a year under the  
91 influence of the regular government-led MDA, and expanded community-based MDA, both of which  
92 aim to significantly reduce STH prevalence and intensity. We also investigate if there is evidence for  
93 predisposition to infection in the study sample when stratified by a variety of confounding variables  
94 including age and sex.

## 95 **Methods:**

### 96 *Study sites and design:*

97 Data were collected in an STH epidemiological study that has been detailed in a previous publication  
98 (8). The study received full ethical approval from the Imperial College Research Ethics Committee,  
99 Imperial College London, UK and the Department of Medical Research Ethics Review Committee,  
100 Ministry of Health and Sports, Myanmar. Data collection took place between June 2015 and June  
101 2016 in Udo village, Taikkyi township, Yangon Region and Kye Kan Theik village, Nyaung Don  
102 township, Ayeyarwaddy Region. Further details on the study sites, including environmental and  
103 socioeconomic information, are provided in the previous publication (8). In June 2015, a  
104 demographic survey and census were completed in the two study villages. Participants for the study  
105 were randomly selected by household. Participants completed questionnaires collecting data on  
106 participants' socioeconomic status, household structure and access to water, sanitation and hygiene  
107 (WaSH) facilities. The study comprised three parasitology surveys in August 2015 (first survey – S1),  
108 December 2015 (second survey – S2) and June 2016 (third survey – S3) (Figure 1). Stool samples  
109 were collected from the participants in each parasitology survey and were assessed for STH infection  
110 using the Kato-Katz method (23). The participants and their stool samples were assigned unique  
111 identification (ID) codes to maintain confidentiality and to link results over all surveys. Treatment  
112 efficacy was measured by collecting stool samples from a sub-sample of participants two weeks after  
113 the first survey (August 2015), post-MDA, and assessing them for STH infection by Kato-Katz.

114 **Fig 1: Flow diagram of data collection and study methods.** DEC = diethylcarbamazine citrate. Reproduced with  
115 permission from the supplementary information of Dunn et al. (2017) (8).

116 *Data:*

117 Data for the following analyses were from all participants who had a recorded Kato-Katz result from  
118 all three surveys. Overall, 523 participants from 211 households had the requisite data. Data from  
119 both villages were merged and analysed as one dataset. Egg counts, measured by the Kato-Katz  
120 method, were multiplied by 24 to give eggs per gram of faeces (EPG) (24). All data were anonymised  
121 and assigned a unique ID code to ensure that data could be linked over the course of the study.

122 *Statistical analysis:*

123 RStudio (R version 3.0.1, Vienna, Austria) was used for the following statistical analyses and to create  
124 the figures. Participants were grouped into age groups as defined by the WHO: preschool-aged  
125 children (pre-SAC) are 2-4 year olds, school-aged children (SAC) are 5-14 year olds and adults are 15+  
126 year olds (4). Exact confidence intervals (95% two-sided) for mean prevalence were calculated using  
127 the Clopper-Pearson method (25). Mean EPG adjusted percentiles (bias-corrected and accelerated -  
128 BCa) were calculated using bootstrapping methodology with the “boot” package. The significance  
129 test for the differences between risk ratios was derived from a formula published by Altman and  
130 Bland, 2003 (26). The WHO recommended intensity cut-offs were used to group individual EPG into  
131 low, medium and high intensity infections (2). To assess the differences in prevalence and intensity  
132 of infection over the surveys we used generalised linear models (GLMs) with a logit link (for binomial  
133 prevalence outcome) or a log link (for negative binomial intensity outcome) and the significance  
134 level was set at  $P \leq 0.05$ . Kendall’s Tau-b values were calculated to assess predisposition to infection,  
135 adjusting for tied ranks, and the significance level set at  $P \leq 0.05$ .

136 The study took place over the course of a year. Therefore, all participants will have aged one year  
137 during the study. Whilst there is a well-established relationship between age and STH infection, for

138 simplicity we maintained the recorded ages for all participants at the age recorded in the first  
139 survey. This is assuming that age-related exposure did not drastically change over the course of a  
140 year. Also, we have maintained the usual WHO definition of SAC (5-14 years old), despite the fact  
141 that there is a different treatment frequency for 5-9 and 10-14 year olds in Myanmar. We have done  
142 this to align with how the WHO expects STH outcomes to be reported regarding infection prevalence  
143 and intensity by age grouping.

#### 144 **Results:**

##### 145 *Response to treatment:*

146 Out of the 523 participants with full Kato-Katz data, 60 (11.47%) were assessed for response to  
147 treatment (i.e. treatment efficacy). Only 15 of the 60 participants had positive STH infections in the  
148 pre-MDA survey and these individuals were therefore used for assessing STH clearance. Due to the  
149 small sample size, response to treatment cannot be accurately quantified and we cannot guarantee  
150 that all positive infections were cleared after MDA. Therefore, “reinfection” in the case of our  
151 analysis does not necessarily refer to new infections picked up between MDA rounds, but rather  
152 changes in the number and proportion of positive infections between surveys.

##### 153 *Reinfection – prevalence:*

154 Over the year (S1 to S3), prevalence of any STH fell by 8.99% and the reduction was statistically  
155 significant ( $P < 0.001$ ). The reductions in prevalence of each STH separately, were also statistically  
156 significant ( $P < 0.05$ ). Prevalence of infection with at least one STH fell between S1 and S2 and was  
157 maintained between S2 and S3 (Table 1). This was also true for *T. trichiura* prevalence where the  
158 efficacy of albendazole to clear infection is much less than for *A. lumbricoides* and hookworm. *A.*  
159 *lumbricoides* infection fell and then rose slightly. Hookworm prevalence decreased over the course  
160 of the three surveys.

**Table 1: Number of positive individuals (n), prevalence (%) and infection intensity of each soil-transmitted helminth species (overall n=523)**

|                            | Any STH |                        | <i>Ascaris lumbricoides</i> |                     |                           | <i>Trichuris trichiura</i> |                       |                         | Hookworm |                      |                           |
|----------------------------|---------|------------------------|-----------------------------|---------------------|---------------------------|----------------------------|-----------------------|-------------------------|----------|----------------------|---------------------------|
|                            | n       | %<br>(95% CI)*         | n                           | %<br>(95% CI)       | Mean EPG<br>(95% CI)      | n                          | %<br>(95% CI)         | Mean EPG<br>(95% CI)    | n        | %<br>(95% CI)        | Mean EPG<br>(95% CI)      |
| <b>Survey 1 (Aug 2015)</b> | 146     | 27.92<br>(24.64-32.64) | 29                          | 5.54<br>(3.83-8.03) | 649.42<br>(370.35-1119.4) | 89                         | 17.02<br>(14.2-20.95) | 73.56<br>(46.99-124.35) | 51       | 9.75<br>(7.51-12.89) | 40.2<br>(22.39-93.3)      |
| <b>Survey 2 (Dec 2015)</b> | 99      | 18.93<br>(16.00-23.03) | 9                           | 1.72<br>(0.81-3.31) | 478.12<br>(87.36-1967.6)  | 62                         | 11.85<br>(9.41-15.25) | 24.32<br>(13.77-54.47)  | 35       | 6.69<br>(4.81-9.38)  | 314.94<br>(10.69-1533.86) |
| <b>Survey 3 (Jun 2016)</b> | 99      | 18.93<br>(16.00-23.03) | 13                          | 2.49<br>(1.36-4.3)  | 670.35<br>(315.2-1392.34) | 62                         | 11.85<br>(9.41-15.25) | 41.07<br>(24.36-72.28)  | 29       | 5.54<br>(3.83-8.03)  | 11.47<br>(6.38-24.78)     |

161 \*% represents the percentage positive in each group. CI = Confidence interval. EPG = eggs per gram of faeces. STH = soil-transmitted helminth



162 Risk ratios (RRs) for reinfection differed between STH species and reinfection period. RRs for the  
163 four-month reinfection period (S1 to S2) were mostly below one, indicating that infection decreased  
164 between these surveys (Figure 2, S1 Table). Most RRs for the six-month reinfection period (S2 to S3)  
165 were above one but the CIs for all six-month RRs cross one, except for *A. lumbricoides* infection in  
166 SAC, indicating non-significance. There were few deviations from the overall patterns of RRs when  
167 stratified by sex and age group. Six-month RRs were significantly higher than four-month RRs within  
168 the sample for all species except hookworm, and were significantly higher within stratifications,  
169 especially SAC (any STH, *A. lumbricoides* and *T. trichiura*), adults (any STH and hookworm) and males  
170 (any STH and *T. trichiura*). However, inversely, the four-month RR for hookworm infection in SAC  
171 was significantly higher than the six-month RR.

172 **Fig 2: Risk ratios of STH prevalence between surveys.** Blue = 4 months reinfection (survey 1 to survey 2). Red =  
173 6 months reinfection (survey 2 to survey 3). \*  $P \leq 0.05$ , \*\*  $P \leq 0.01$ , \*\*\*  $P \leq 0.001$  – black asterisks represent  
174 statistical significance of each risk ratio, green asterisks represent statistical difference between risk ratios for  
175 each group. Horizontal lines represent 95% confidence intervals. Pre-SAC = preschool-aged children (2-4 years  
176 old), SAC = school-aged children (5-14 years old), Adult = 15+ years old. No positive *Ascaris lumbricoides*  
177 infections were found in pre-SAC for all surveys, therefore no points are presented.

178 *Reinfection – intensity:*

179 Over the year (S1 to S3), EPG decreased for *T. trichiura* and hookworm, but rose for *A. lumbricoides*  
180 (Table 1). However, the only statistically significant difference was for the decrease in hookworm  
181 EPG from 40.20 to 11.47 ( $P < 0.05$ ). A majority of the positive STH infections in all three surveys were  
182 low intensity infections. Over all the surveys and species infections, of the 98 instances that  
183 infections moved from negative in the prior survey to positive, 88 (89.80%) moved to low intensity,  
184 seven (7.14%) to medium intensity and three (3.06%) to high intensity (Table 2). Of the 95 instances  
185 where individuals were reinfected after treatment to the same intensity group as recorded in the

186 prior survey, 87 (91.58%) were low to low intensity, eight (8.42%) were medium to medium  
 187 intensity, and none were high to high intensity.

**Table 2: Percentage and number (n) of individual infections between infection and intensity groups (overall n = 523)**

|                                           | <i>Ascaris lumbricoides</i> |             | <i>Trichuris trichiura</i> |             | Hookworm    |             |
|-------------------------------------------|-----------------------------|-------------|----------------------------|-------------|-------------|-------------|
|                                           | S1-S2                       | S2-S3       | S1-S2                      | S2-S3       | S1-S2       | S2-S3       |
| <b>Never infected (neg-neg)</b>           | 93.50 (489)                 | 96.75 (506) | 79.16 (414)                | 82.22 (430) | 86.81 (454) | 90.25 (472) |
| <b>Cured (pos-neg)</b>                    | 4.78 (25)                   | 0.76 (4)    | 8.99 (47)                  | 5.93 (31)   | 6.50 (34)   | 4.21 (22)   |
| <b>Negative to infected (neg-pos)</b>     | 0.96 (5)                    | 1.53 (8)    | 3.82 (20)                  | 5.93 (31)   | 3.44 (18)   | 3.06 (16)   |
| <b>Decrease intensity group (pos-pos)</b> | 0.38 (2)                    | 0           | 0.96 (5)                   | 0.38 (2)    | 0.19 (1)    | 0           |
| <b>Same intensity group (pos-pos)</b>     | 0.19 (1)                    | 0.57 (3)    | 6.88 (36)                  | 4.97 (26)   | 3.06 (16)   | 2.49 (13)   |
| <b>Increase intensity group (pos-pos)</b> | 0.19 (1)                    | 0.38 (2)    | 0.19 (1)                   | 0.57 (3)    | 0           | 0           |

188 *Pos = positive. Neg= negative. S1 = survey 1 (August 2015), S2 = survey 2 (December 2015), S3 = survey 3 (June*  
 189 *2016).*

190 Overall mean EPG decreased from S1 to S2 but increased from S2 to S3 for *A. lumbricoides* and *T.*  
 191 *trichiura*. Hookworm mean EPG increased from S1 to S2 and decreased from S2 to S3 (Table 1).

192 When mean EPG change was stratified by age group (Figure 3, S2 Table) these patterns were  
 193 reflected for all age groups except the 25-39 year olds for *A. lumbricoides*. The mean change in EPG  
 194 was not homogenous between all age groups. There was minimal change in mean EPG for both *A.*  
 195 *lumbricoides* and *T. trichiura* in the youngest and oldest age groups. For hookworm, the increase and  
 196 decrease in mean EPG was driven by the change in 5-14 year olds.

197 **Fig 3: Mean change in eggs per gram of faeces (EPG) by age group.** *Red bars = 4 months reinfection (survey 1*  
 198 *to survey 2). Blue bars = 6 months reinfection (survey 2 to survey 3). Vertical lines represent 95% confidence*  
 199 *intervals.*

200 *Predisposition to STH infection (consistent infection):*

201 A total of 38 (7.27%) participants had STH positive infections in all three surveys and 67 (12.81%) had  
 202 positive infections for any two of the three surveys. Correlation coefficients (Kendall Tau-b) of  
 203 individual participants' egg count results between surveys were statistically significant for all species  
 204 of STH (Table 3). Most of the correlations remained significant when stratified by sex or age group.  
 205 Tau values ranged between zero and one, a higher value indicates stronger concordance (27).

206 *Trichuris trichiura* egg counts had the strongest concordance between surveys especially for males,  
 207 SAC and pre-SAC. The strongest concordance was for hookworm egg counts in pre-SAC between the  
 208 first and second surveys. However, the Kendall's Tau-b value may have been inflated due to the  
 209 small number of pre-SAC infected with hookworm (two in survey one, three in survey two). Non-  
 210 significant and low Tau values were calculated for *A. lumbricoides* infection in males and hookworm  
 211 infection in SAC, denoting little evidence for predisposition in these groups.

**Table 3: Kendall's Tau-b correlation coefficients for individual participants' egg counts between surveys**

|           |         | <i>Ascaris lumbricoides</i> |         |         | <i>Trichuris trichiura</i> |         |         | Hookworm |         |         |
|-----------|---------|-----------------------------|---------|---------|----------------------------|---------|---------|----------|---------|---------|
|           |         | S1-S2                       | S2-S3   | S1-S3   | S1-S2                      | S2-S3   | S1-S3   | S1-S2    | S2-S3   | S1-S3   |
| Overall   |         | 0.23***                     | 0.45*** | 0.23*** | 0.50***                    | 0.43*** | 0.48*** | 0.36***  | 0.36*** | 0.37*** |
| Sex       | Male    | 0.02                        | 0.44*** | 0.14**  | 0.54***                    | 0.50*** | 0.58*** | 0.41***  | 0.43*** | 0.42*** |
|           | Female  | 0.37***                     | 0.45*** | 0.27*** | 0.47***                    | 0.38*** | 0.40*** | 0.27***  | 0.27*** | 0.25*** |
| Age group | Pre-SAC | NA                          | NA      | 0.03    | 0.62***                    | 0.55*** | 0.41*   | 0.81***  | 0.57*** | 0.67*** |
|           | SAC     | 0.30*                       | 0.58*** | 0.23*   | 0.62***                    | 0.41*** | 0.56*** | 0.02     | 0.25*   | 0.01    |
|           | Adults  | 0.18***                     | 0.40*** | 0.24*** | 0.40***                    | 0.40*** | 0.38*** | 0.38***  | 0.37*** | 0.36*** |

212 \*  $P \leq 0.05$ . \*\*  $P \leq 0.01$ . \*\*\*  $P \leq 0.001$ . S1 = survey 1 (August 2015). S2 = survey 2 (December 2015). S3 = survey

213 3 (June 2016). Kendall Tau-b values: Blue = 0.00-0.25, Green=0.26-0.50, Orange=0.51-0.75, Red=0.76-1.00,

214 Grey=non-significant. Pre-SAC = preschool-aged children (2-4 years old). SAC = school-aged children (5-14 years

215 old). Adults = 15+ years old. NA = comparison not possible (zero positive *Ascaris lumbricoides* infections in pre-

216 SAC survey 2).

## 217 Discussion:

218 Myanmar has been conducting SAC-targeted MDA since 2003, and community-wide MDA in the

219 delta region since 2013 (5,9). Whilst STH prevalence has dropped significantly since the initiation of

220 MDA, the prevalence target set by WHO to discontinue MDA (under 1%) has not yet been reached in

221 surveyed communities (8,28). Currently, there is no monitoring and evaluation (M&E) of STH in

222 Myanmar, and no longitudinal studies have taken place since 1990 (29). It is therefore important for

223 longitudinal M&E studies to take place in the country so that the long-term impact of MDA can be

224 evaluated. The analyses in this study demonstrate that STH prevalence and intensity levels vary

225 throughout the year. Overall prevalence of each STH was reduced following two community-wide

226 MDA rounds (prevalence of any STH - 27.92-18.93%), and the intensities of infection (measured by  
227 EPG) of each STH, except *A. lumbricoides*, were reduced.

228 In this analysis, risk ratios were used to describe the patterns of infection over a four-month and six-  
229 month reinfection period. Four months post-MDA, the risk of STH infection was lower than in the  
230 preceding survey (RR=0.67, 95% CI 0.56-0.81). The only statistically significant six-month RR was for  
231 *A. lumbricoides* infection in SAC (RR=2.67, 95% CI 1.37-5.21). However, the six-month RRs were  
232 significantly higher than the four-month RRs for infection with all STH species except hookworm. Six-  
233 month RRs were also statistically significantly higher for SAC for infection with any STH, *A.*  
234 *lumbricoides* and *T. trichiura*, but were significantly lower for hookworm. The reinfection rates for  
235 STH species and the rapidity of bounce back to pre-treatment levels, are fast for *A. lumbricoides* and  
236 *T. trichiura*, and slower for hookworm. This is in part related to the fact that the dynamical timescale  
237 of each infection in its response to population disturbance as induced by MDA is directly related to  
238 adult worm life expectancy, which is around one year for *A. lumbricoides* and *T. trichiura* and about  
239 two years for hookworm (30). A study by Yap *et al.*, conducted in China, measured rapid reinfection  
240 of *A. lumbricoides* (75.8% and 83.8% four and six months post-treatment, respectively), but not for  
241 *T. trichiura* and hookworm (31). Other studies have recorded STH reinfection after six months post-  
242 treatment, but not to above the pre-treatment prevalence levels (32,33). If we assume that the MDA  
243 rounds had cleared infection, then the data suggest that four months is not enough time for STH to  
244 reinfect individuals to the infection levels before that particular round of treatment, but six months  
245 may be enough time. It should also be noted that the third survey (June 2016) took place two  
246 months prior to the usual MDA timing (August) when only SAC are treated. As such, SAC will have a  
247 further two months for reinfection and adults will have a further six or seven months until the  
248 community-wide lymphatic filariasis (LF) MDA round. However, it is more likely that, due to sub-  
249 100% drug efficacy and non-compliance to treatment, some infections were retained after MDA, and  
250 six months was enough time for the surviving helminths to release sufficient eggs to trigger the  
251 acquisition of new *A. lumbricoides* infections in SAC. There is also the possibility of a seasonal effect

252 on transmission and reinfection (34,35). The first and third surveys both took place during the dry  
253 season, whereas the second survey took place during the rainy season. Infective stage survival is  
254 known to be increased during rainy seasons (35,36).

255 Prevalence is used as a key STH epidemiological metric, but intensity of infection is more important  
256 as a determinant of morbidity (2). Whilst STH prevalence dropped significantly between the first and  
257 third surveys, the slight reductions in mean *T. trichiura* and hookworm EPG were not statistically  
258 significant. STH intensity at the beginning of the study was already at a very low level. Most  
259 participants with positive infections had low intensity infections. Prior work on the effect of long-  
260 term MDA programmes on STH have identified that substantial drops in STH prevalence and  
261 intensity in the first years of MDA may be followed by smaller reductions in subsequent years  
262 (37,38). For example, an eight year MDA programme in Burundi reported significant drops in  
263 prevalence in the first four years and no further decrease in the last four years (38). A monitoring  
264 survey in Kenya found that whilst prevalence of *T. trichiura* was significantly reduced after three  
265 years of MDA, mean EPG was not (39). The reasons for this may well be related to MDA coverage  
266 levels and individual compliance to treatment at multiple rounds of treatment (40). Few studies to  
267 date have recorded individual compliance to treatment but the persistence of low levels of  
268 prevalence may, in part, be due to persistent non-compliers to treatment (41).

269 In this study, the largest changes in EPG between surveys were found in the 5-14 years age group.  
270 Since the whole of the study sample was treated (not just SAC), any changes in EPG must be due to  
271 differences within the age groups (including compliance to treatment and behavioural factors) and  
272 not treatment efficacy. There was an increased risk of SAC to STH infection, especially *A.*  
273 *lumbricoides* and *T. trichiura*. Evidence of predisposition to STH infection has been found in several  
274 epidemiology studies (16,42,43) and the results of the Kendall's Tau-b analysis indicates that  
275 predisposition to infection exists within the study sample. Stronger concordance between survey egg  
276 counts, and therefore stronger evidence for predisposition, was found in males and the younger age

277 groups for *T. trichiura* and hookworm infection but only in females for *A. lumbricoides* infection. This  
278 is in agreement with Holland *et al.* (44), who found stronger evidence for *A. lumbricoides*  
279 predisposition in females , but in disagreement with Haswell-Elkins *et al.* (45) and Quinnell *et al.*  
280 (46), with females more predisposed to hookworm infection.

281 A limitation of this study, following on from the data collection study that preceded it, is the low  
282 sensitivity of the Kato-Katz technique as a diagnostic tool. It is highly possible that positive infections  
283 were missed due to its use (47). Another limitation is that, due to ethical reasons, the whole study  
284 sample (all ages) had to be treated during the MDA rounds that immediately followed the surveys,  
285 instead of the usual targeted ages (SAC only after the first and third surveys). The patterns of  
286 reinfection presented here therefore do not necessarily represent the patterns that will have  
287 occurred in previous years. This will have affected the results by increasing the drop in STH infection  
288 between surveys, potentially exaggerating sample-wide reinfection after MDA. Finally, as we could  
289 not confirm clearance of infection after MDA, the results may not be viewed as true “reinfection”.  
290 During data collection we attempted to ensure that treatment was taken via directly-observed  
291 therapy (DOT) where possible, but without data to confirm that infections were cleared we cannot  
292 assume this was always the case.

293 In this study the villages had already received over 10 years of MDA (both to treat STH and LF), yet  
294 low level STH infection persists. This may well be due to persistent non-compliers to multiple rounds  
295 of treatment who continue to release infective stages into the environment, as well as the  
296 perpetuation of those infective stages in the environment without improved WaSH to prevent it  
297 (48,49). The key epidemiological observation in this study is the low-level persistence of infection  
298 despite frequent community-based MDA, and the strong evidence for predisposition. In the long  
299 term, if diagnosis can be made more precise with new tools such as qPCR and the costs of such tests  
300 be greatly reduced, then future STH control may need to be based on targeted treatment to those  
301 predisposed to infection in order to eliminate transmission (50,51).

302 **Acknowledgements**

303 We thank the Myanmar Ministry of Health and Sports for their continued support and advice. We  
304 thank Tom Churcher, Maria-Gloria Basáñez and Rachel Pullan for their comments on earlier drafts of  
305 this manuscript. We thank James Truscott for advice concerning data analysis and visualisation.

306 **References:**

- 307 1. Pullan RL, Smith JL, Jasrasaria R, Brooker SJ. Global numbers of infection and disease burden  
308 of soil transmitted helminth infections in 2010. *Parasit Vectors*. 2014;7(1).
- 309 2. WHO. Eliminating soil-transmitted helminthiasis as a public health problem in children:  
310 progress report 2001-2010 and strategic plan 2011-2020. Geneva, Switzerland: World Health  
311 Organization; 2012.
- 312 3. WHO. Guideline: Preventive chemotherapy to control soil-transmitted helminth infections in  
313 at-risk population groups. WHO. Geneva: World Health Organization; 2017.
- 314 4. WHO. Helminth control in school-age children - Second Edition. Geneva, Switzerland: World  
315 Health Organization; 2012.
- 316 5. Tun A, Myat SM, Gabrielli AF, Montresor A. Control of soil-transmitted helminthiasis in  
317 Myanmar: results of 7 years of deworming. *Trop Med Int Heal*. 2013;18(8):1017–20.
- 318 6. WHO. PCT databank: soil-transmitted helminthiasis [Internet]. Geneva, Switzerland: World  
319 Health Organization; 2017 [cited 2017 Jan 4]. Available from:  
320 [http://www.who.int/neglected\\_diseases/preventive\\_chemotherapy/sth/en/](http://www.who.int/neglected_diseases/preventive_chemotherapy/sth/en/)
- 321 7. Padmasiri EA, Montresor A, Biswas G, de Silva NR. Controlling lymphatic filariasis and soil-  
322 transmitted helminthiasis together in South Asia: opportunities and challenges. *Trans R Soc*  
323 *Trop Med Hyg*. 2006;100(9):807–10.

- 324 8. Dunn JC, Bettis AA, Wyine NY, Lwin AMM, Lwin ST, Su KK, et al. A cross-sectional survey of  
325 soil-transmitted helminthiases in two Myanmar villages receiving mass drug administration:  
326 epidemiology of infection with a focus on adults. *Parasit Vectors*. 2017;10(374).
- 327 9. Montresor A, Zin TT, Padmasiri E, Allen H, Savioli L. Soil-transmitted helminthiasis in  
328 Myanmar and approximate costs for countrywide control. *Trop Med Int Heal*.  
329 2004;9(9):1012–5.
- 330 10. Grensis RK. Immunity to helminths: resistance, regulation, and susceptibility to  
331 gastrointestinal nematodes. *Annu Rev Immunol*. United States; 2015;33:201–25.
- 332 11. Keiser J, Utzinger J. Efficacy of current drugs against soil-transmitted helminth infections. *J*  
333 *Am Med Assoc*. 2008;299(16):1937–48.
- 334 12. Belew S, Getachew M, Suleman S, Mohammed T, Deti H, D’Hondt M, et al. Assessment of  
335 efficacy and quality of two albendazole brands commonly used against soil-transmitted  
336 helminth infections in school children in Jimma Town, Ethiopia. *PLoS Negl Trop Dis*. 2015;9(9).
- 337 13. Sinniah B, Chew PI, Subramaniam K. A comparative trial of albendazole, mebendazole,  
338 pyrantel pamoate and oxantel pyrantel pamoate against soil-transmitted helminthiases in  
339 school children. *Trop Biomed*. 1990;7(2):129–34.
- 340 14. Stephenson LS, Latham MC, Kinoti SN, Kurz KM, Brighall H. Improvements in physical fitness  
341 of Kenyan schoolboys infected with hookworm, *Trichuris trichiura* and *Ascaris lumbricoides*  
342 following a single dose of albendazole. *Trans R Soc Trop Med Hyg*. 1990;84:277–82.
- 343 15. Cundill B, Alexander N, Bethony JM, Diemert D, Pullan RL, Brooker S. Rates and intensity of  
344 re-infection with human helminths after treatment and the influence of individual,  
345 household, and environmental factors in a Brazilian community. *Parasitology*.  
346 2011;138(11):1406–16.



- 347 16. Schad GA, Anderson RM. Predisposition to hookworm infection in humans. *Science*. 1985  
348 Jun;228(4707):1537–40.
- 349 17. Mangano VD, Modiano D. Host genetics and parasitic infections. *Clin Microbiol Infect*.  
350 England; 2014 Dec;20(12):1265–75.
- 351 18. Saltykova IV, Freydin MB, Ogorodova LM, Puzyrev VP. Genetic predisposition to  
352 helminthiasis. *Russ J Genet Appl Res*. 2014;4(5):405–15.
- 353 19. Holland C V. Predisposition to ascariasis: patterns, mechanisms and implications.  
354 *Parasitology*. 2009 Oct;136(12):1537–47.
- 355 20. Walker M, Hall A, Basáñez MG. Individual predisposition, household clustering and risk  
356 factors for human infection with *Ascaris lumbricoides*: New epidemiological insights. *PLoS*  
357 *Negl Trop Dis*. 2011;5(4).
- 358 21. Truscott JE, Hollingsworth TD, Brooker SJ, Anderson RM. Can chemotherapy alone eliminate  
359 the transmission of soil transmitted helminths. *Parasit Vectors*. 2014;7(1):266.
- 360 22. Anderson R, Farrell S, Turner H, Walson J, Donnelly CA, Truscott J. Assessing the interruption  
361 of the transmission of human helminths with mass drug administration alone: optimizing the  
362 design of cluster randomized trials. *Parasit Vectors*. 2017;10(93).
- 363 23. Katz N, Chaves A, Pellegrino J. A simple device for quantitative stool thick-smear technique in  
364 *Schistosomiasis mansoni*. *Rev Inst Med Trop Sao Paulo*. 1972;14(6):397.
- 365 24. WHO. Bench aids for the diagnosis of intestinal parasites. Geneva, Switzerland; 1994.
- 366 25. Newcombe RG. Two-sided confidence intervals for the single proportion: comparison of  
367 seven methods. *Stat Med*. 1998;17:857–72.
- 368 26. Altman DG, Bland JM. Interaction revisited: the difference between two estimates. *BMJ*. 2003

- 369 Jan 25;326(7382):219.
- 370 27. Ng SK, Holden L, Sun J. Identifying comorbidity patterns of health conditions via cluster  
371 analysis of pairwise concordance statistics. *Stat Med*. John Wiley & Sons, Ltd; 2012 Nov  
372 30;31(27):3393–405.
- 373 28. Htoon TT, Tun T, Oo KY, Thein W, Tin HH, Chai J-Y, et al. Status of infection with soil-  
374 transmitted helminths among primary school children in three selected townships of Yangon  
375 Division. *Myanmar Heal Sci Res J*. 2015;27(3).
- 376 29. Hlaing T, Saw T, Kyin M-L. Control of ascariasis through age-targeted chemotherapy: Impact  
377 of 6-monthly chemotherapeutic regimens. *Bull World Health Organ*. 1990;68(6):747–53.
- 378 30. Anderson RM, Medley GF. Community control of helminth infections of man by mass and  
379 selective chemotherapy. *Parasitology*. 1985;90(04):629–60.
- 380 31. Yap P, Du Z-W, Wu F-W, Jiang J-Y, Chen R, Zhou X-N, et al. Rapid re-infection with soil-  
381 transmitted helminths after triple-dose albendazole treatment of school-aged children in  
382 Yunnan, People’s Republic of China. *Am J Trop Med Hyg*. American Society of Tropical  
383 Medicine and Hygiene; 2013 Jul;89(1):23–31.
- 384 32. Sinniah B. Prevalence, treatment and reinfection of intestinal helminths among  
385 schoolchildren in Kuala Lumpur, Malaysia. *Public Health*. 1984;98(1):38–42.
- 386 33. Saathoff E, Olsen A, Kvalsvig JD, Appleton CC. Patterns of geohelminth infection, impact of  
387 albendazole treatment and re-infection after treatment in schoolchildren from rural KwaZulu-  
388 Natal/South-Africa. *BMC Infect Dis*. 2004 Dec 13;4(1):27.
- 389 34. Udonsi JK. Effectiveness of seasonal community-based mass-expulsion chemotherapy in the  
390 control of human hookworm infections in endemic communities. *Public Health*. 1985/09/01.  
391 1985;99(5):295–301.

- 392 35. Davis EL, Danon L, Prada JM, Gunawardena SA, Truscott JE, Vlaminck J, et al. Seasonally timed  
393 treatment programs for *Ascaris lumbricoides* to increase impact—An investigation using  
394 mathematical models. *PLoS Negl Trop Dis*. 2018;12(1):e0006195.
- 395 36. Schulz S, Kroeger A. Soil contamination with *Ascaris lumbricoides* eggs as an indicator of  
396 environmental hygiene in urban areas of north-east Brazil. *J Trop Med Hyg*. 1992  
397 Apr;95(2):95–103.
- 398 37. Supali T, Djuardi Y, Bradley M, Noordin R, Ruckert P, Fischer PU, et al. Impact of six rounds of  
399 mass drug administration on Brugian filariasis and soil-transmitted helminth infections in  
400 eastern Indonesia. *PLoS Negl Trop Dis*. 2013/12/19. 2013;7(12):e2586.
- 401 38. Ortu G, Assoum M, Wittmann U, Knowles S, Clements M, Ndayishimiye O, et al. The impact of  
402 an 8-year mass drug administration programme on prevalence, intensity and co-infections of  
403 soil-transmitted helminthiases in Burundi. *Parasit Vectors*. 2016 Dec 22;9(1):513.
- 404 39. Okoyo C, Nikolay B, Kihara J, Simiyu E, Garn J V, Freeman MC, et al. Monitoring the impact of  
405 a national school based deworming programme on soil-transmitted helminths in Kenya: the  
406 first three years, 2012 - 2014. *Parasit Vectors*. 2016 Jul;9(1):408.
- 407 40. Farrell S, Truscott J, Anderson RM. The importance of patient compliance in repeated rounds  
408 of mass drug administration (MDA) for the elimination of intestinal helminth transmission.  
409 *Parasit Vectors*. 2017;
- 410 41. Shuford K V., Turner HC, Anderson RM. Compliance with anthelmintic treatment in the  
411 neglected tropical diseases control programmes: a systematic review. *Parasit Vectors*. 2016  
412 Dec 27;9(1):29.
- 413 42. Kepha S, Mwandawiro CS, Anderson RM, Pullan RL, Nuwaha F, Cano J, et al. Impact of single  
414 annual treatment and four-monthly treatment for hookworm and *Ascaris lumbricoides*, and

- 415 factors associated with residual infection among Kenyan school children Multilingual  
416 abstracts. *Infect Dis Poverty*. 2017;6(30).
- 417 43. Wright JE, Werkman M, Dunn JC, Anderson RM. Current epidemiological evidence for  
418 predisposition to high or low intensity human helminth infection: a systematic review. *Parasit*  
419 *Vectors*. BioMed Central; 2018 Dec 31;11(1):65.
- 420 44. Holland C V, Asaolu SO, Crompton DW, Stoddart RC, Macdonald R, Torimiro SE. The  
421 epidemiology of *Ascaris lumbricoides* and other soil-transmitted helminths in primary school  
422 children from Ile-Ife, Nigeria. *Parasitology*. 1989 Oct;99 Pt 2(2):275–85.
- 423 45. Haswell-Elkins MR, Elkins DB, Manjula K, Michael E, Anderson RM. An investigation of  
424 hookworm infection and reinfection following mass anthelmintic treatment in the South  
425 Indian fishing community of Vairavankuppam. *Parasitology*. 1988;96(3):565–77.
- 426 46. Quinnell RJ, Slater AF, Tighe P, Walsh EA, Keymer AE, Pritchard DI. Reinfection with  
427 hookworm after chemotherapy in Papua New Guinea. *Parasitology*. 1993;106(4):379–85.
- 428 47. Easton A V, Oliveira RG, O’Connell EM, Kepha S, Mwandawiro CS, Njenga SM, et al. Multi-  
429 parallel qPCR provides increased sensitivity and diagnostic breadth for gastrointestinal  
430 parasites of humans: field-based inferences on the impact of mass deworming. *Parasit*  
431 *Vectors*. 2016 Jan 27;9(1):38.
- 432 48. Campbell SJ, Biritwum N-K, Woods G, Velleman Y, Fleming F, Stothard JR. Tailoring Water,  
433 Sanitation, and Hygiene (WASH) Targets for Soil-Transmitted Helminthiasis and  
434 Schistosomiasis Control. *Trends Parasitol*. 2017;1689.
- 435 49. Ziegelbauer K, Speich B, Mäusezahl D, Bos R, Keiser J, Utzinger J, et al. Effect of Sanitation on  
436 Soil-Transmitted Helminth Infection: Systematic Review and Meta-Analysis. *PLoS Med*. 2012  
437 Jan 24;9(1):e1001162.

438 50. Easton A V., Oliveira RG, Walker M, O'Connell EM, Njenga SM, Mwandawiro CS, et al. Sources  
439 of variability in the measurement of *Ascaris lumbricoides* infection intensity by Kato-Katz and  
440 qPCR. *Parasit Vectors*. 2017 Dec 25;10:256.

441 51. Mejia R, Vicuña Y, Broncano N, Sandoval C, Vaca M, Chico M, et al. A Novel, Multi-Parallel,  
442 Real-Time Polymerase Chain Reaction Approach for Eight Gastrointestinal Parasites Provides  
443 Improved Diagnostic Capabilities to Resource-Limited At-Risk Populations. *Am J Trop Med*  
444 *Hyg*. The American Society of Tropical Medicine and Hygiene; 2013;88(6):1041–7.

445 **Acronyms and abbreviations:**

446 BCa Bias-corrected and accelerated

447 CI Confidence interval

448 DOT Directly observed therapy

449 EPG Eggs per gram of faeces

450 GLM Generalised linear model

451 GPELF Global Programme to Eliminate Lymphatic Filariasis

452 ID Identification

453 LF Lymphatic filariasis

454 MDA Mass drug administration

455 NTD Neglected tropical disease

456 PCA Principal components analysis

457 pre-SAC Preschool-aged children

|     |                                                                        |                               |
|-----|------------------------------------------------------------------------|-------------------------------|
| 458 | RR                                                                     | Risk ratio                    |
| 459 | S1                                                                     | Survey 1                      |
| 460 | S2                                                                     | Survey 2                      |
| 461 | S3                                                                     | Survey 3                      |
| 462 | SAC                                                                    | School-aged children          |
| 463 | SES                                                                    | Socioeconomic status          |
| 464 | STH                                                                    | Soil-transmitted helminth     |
| 465 | WaSH                                                                   | Water, sanitation and hygiene |
| 466 | WHO                                                                    | World Health Organization     |
| 467 | WRA                                                                    | Women of reproductive age     |
| 468 | <b>Supplementary information:</b>                                      |                               |
| 469 | S1 Table: Risk ratios of STH infection between surveys                 |                               |
| 470 | S2 Table: Mean change in eggs per gram of faeces (EPG) between surveys |                               |
| 471 | S3: STROBE Checklist                                                   |                               |

Any STH

*Ascaris lumbricoides*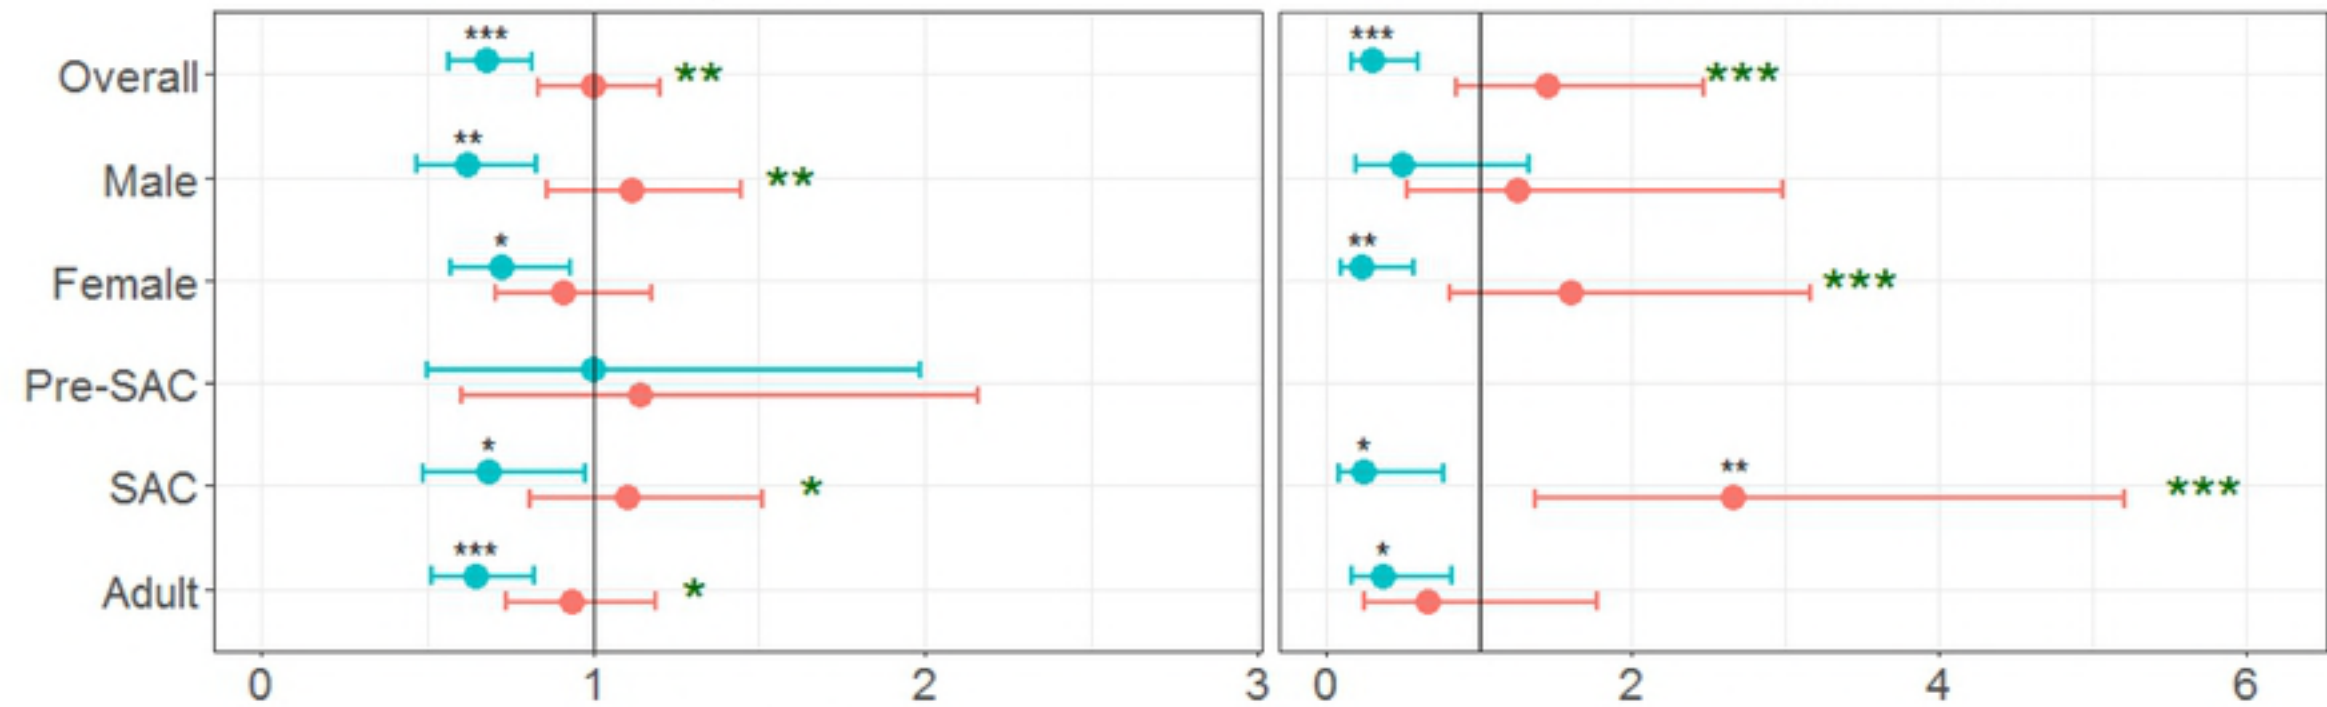*Trichuris trichiura*

Hookworm

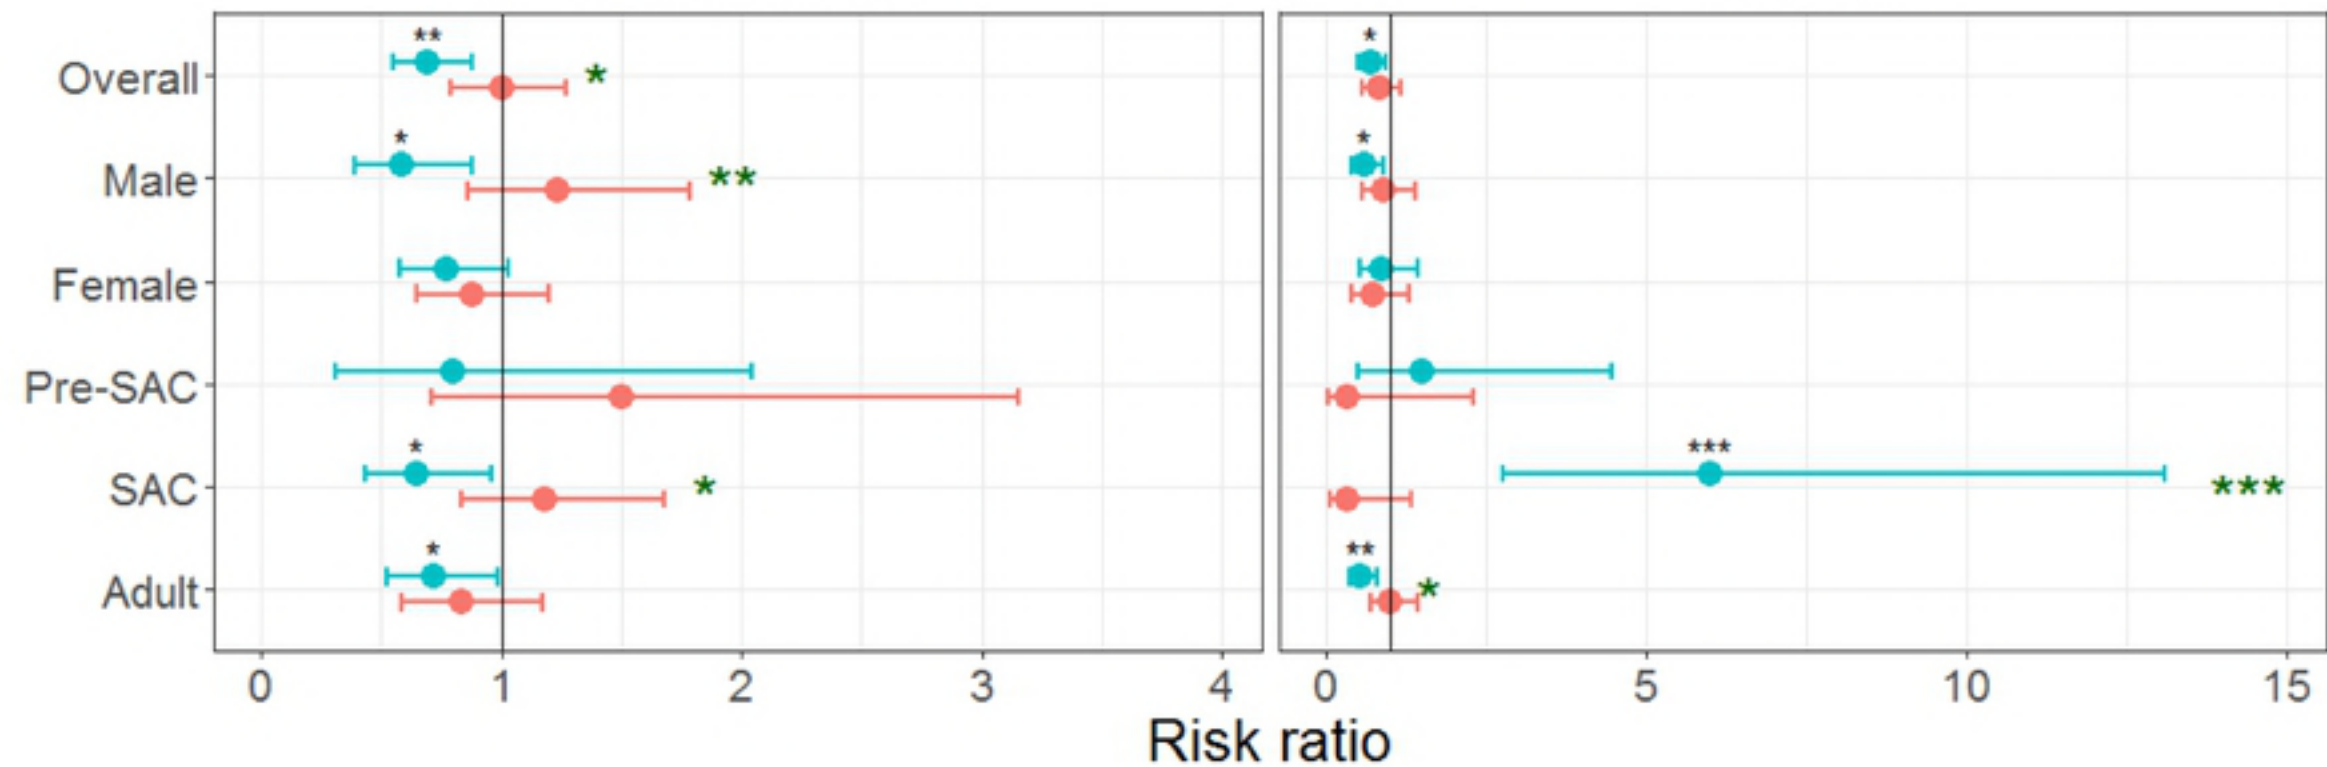

Risk ratio

*Ascaris lumbricoides*

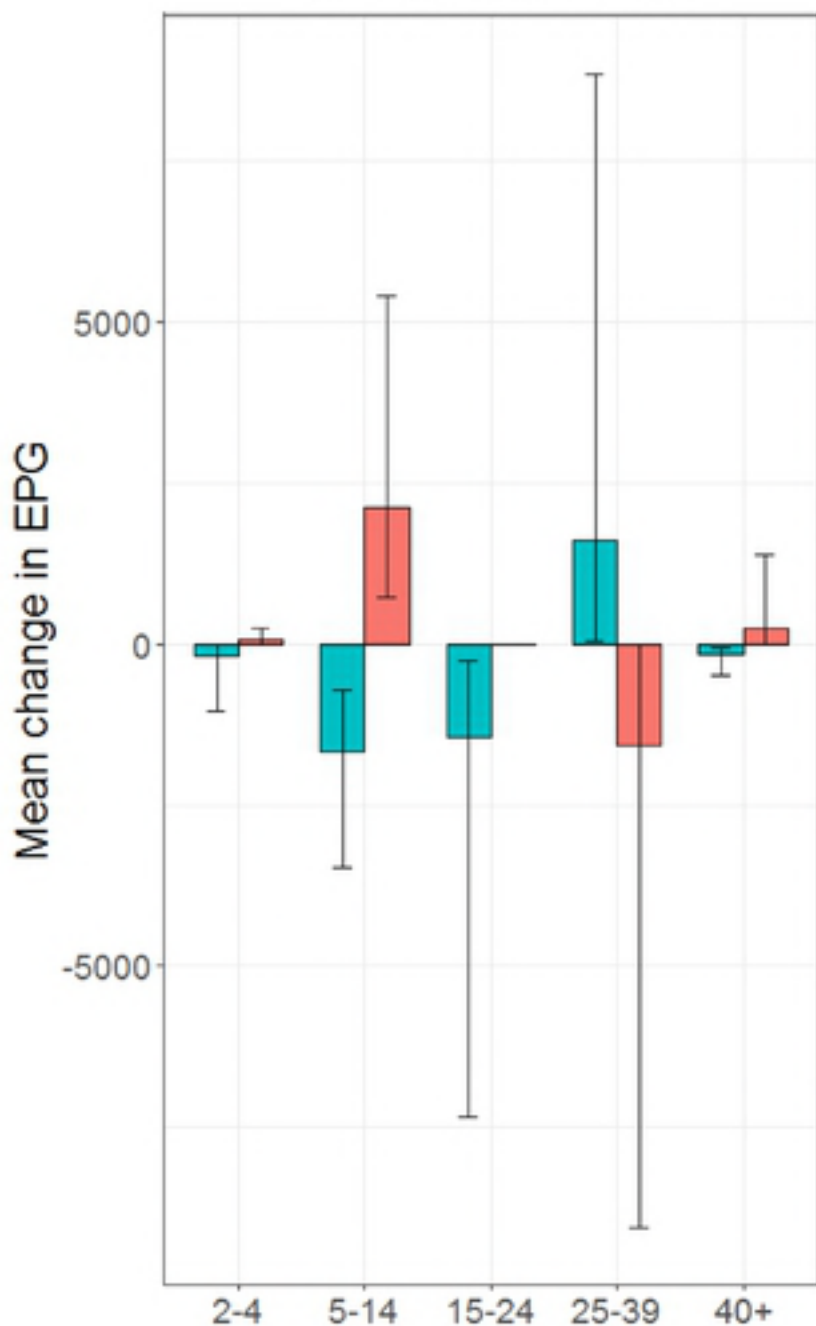

*Trichuris trichiura*

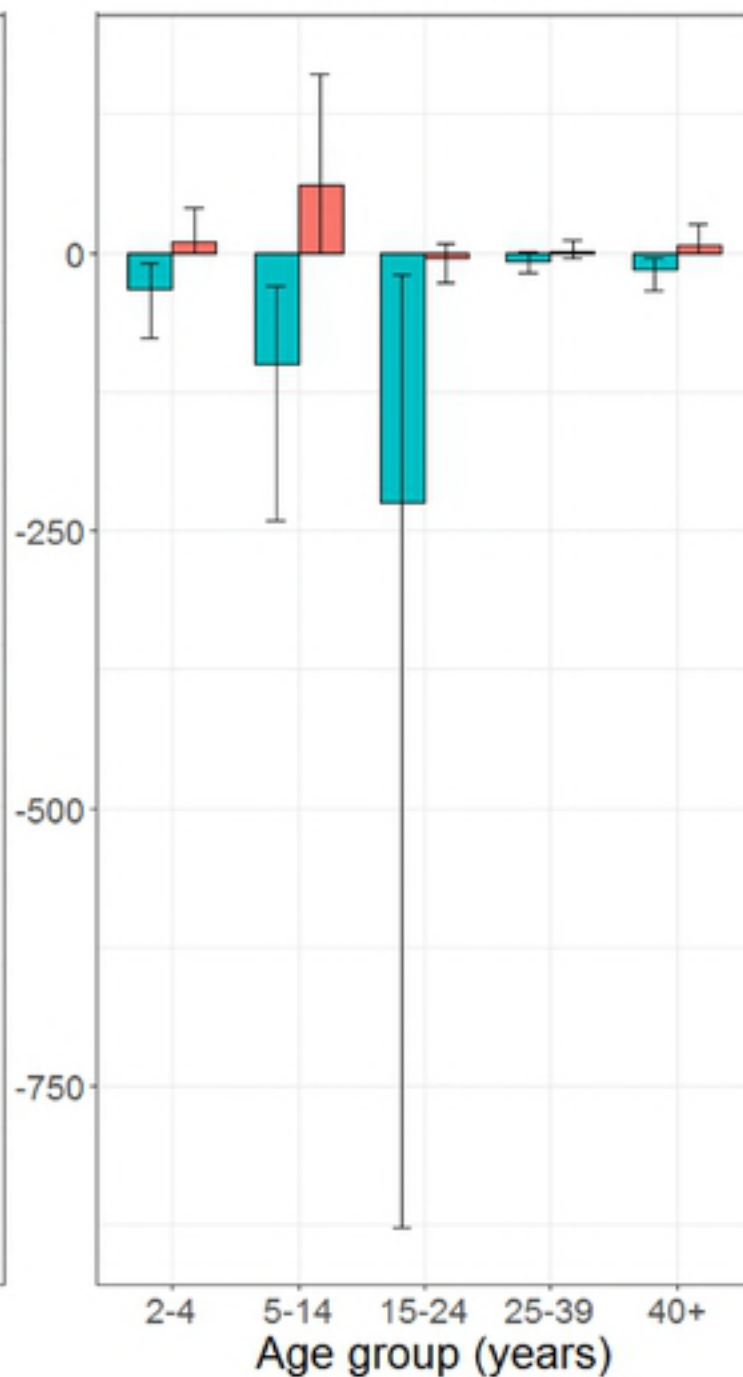

Hookworm

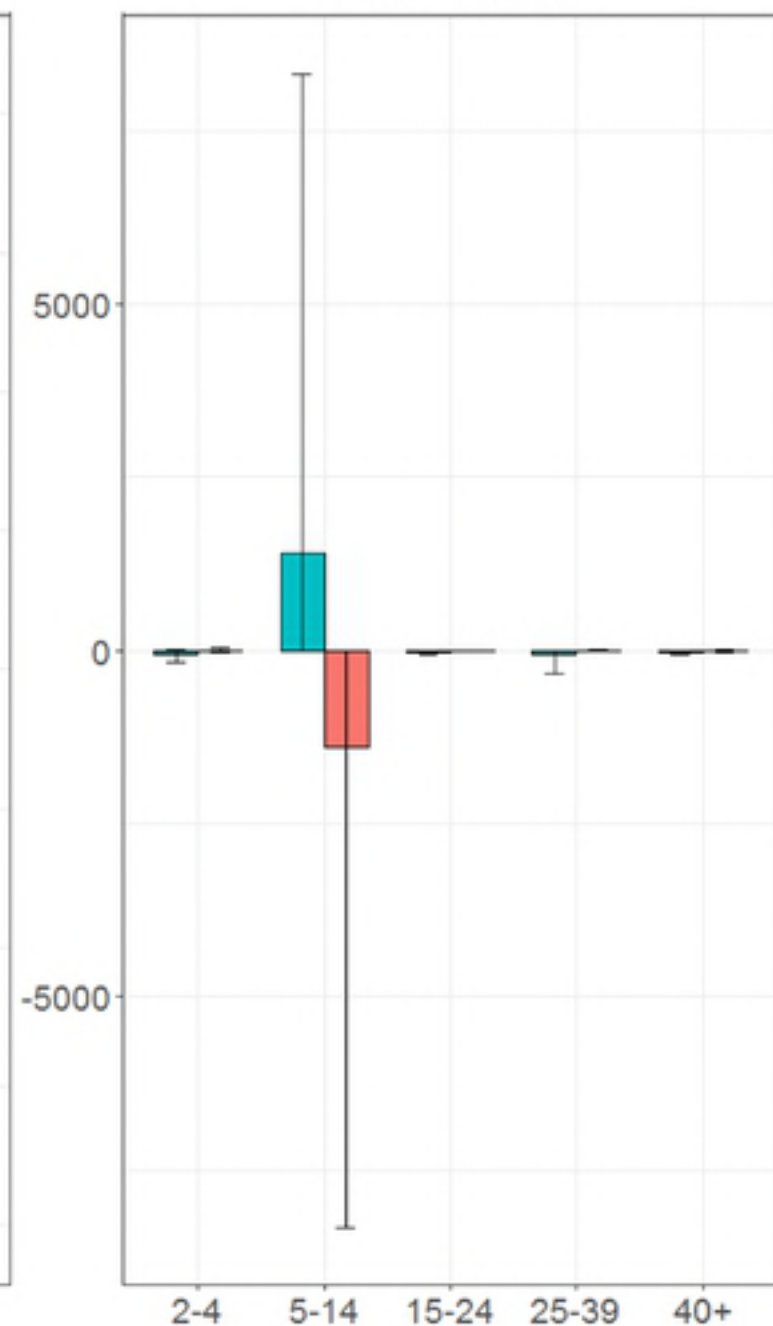



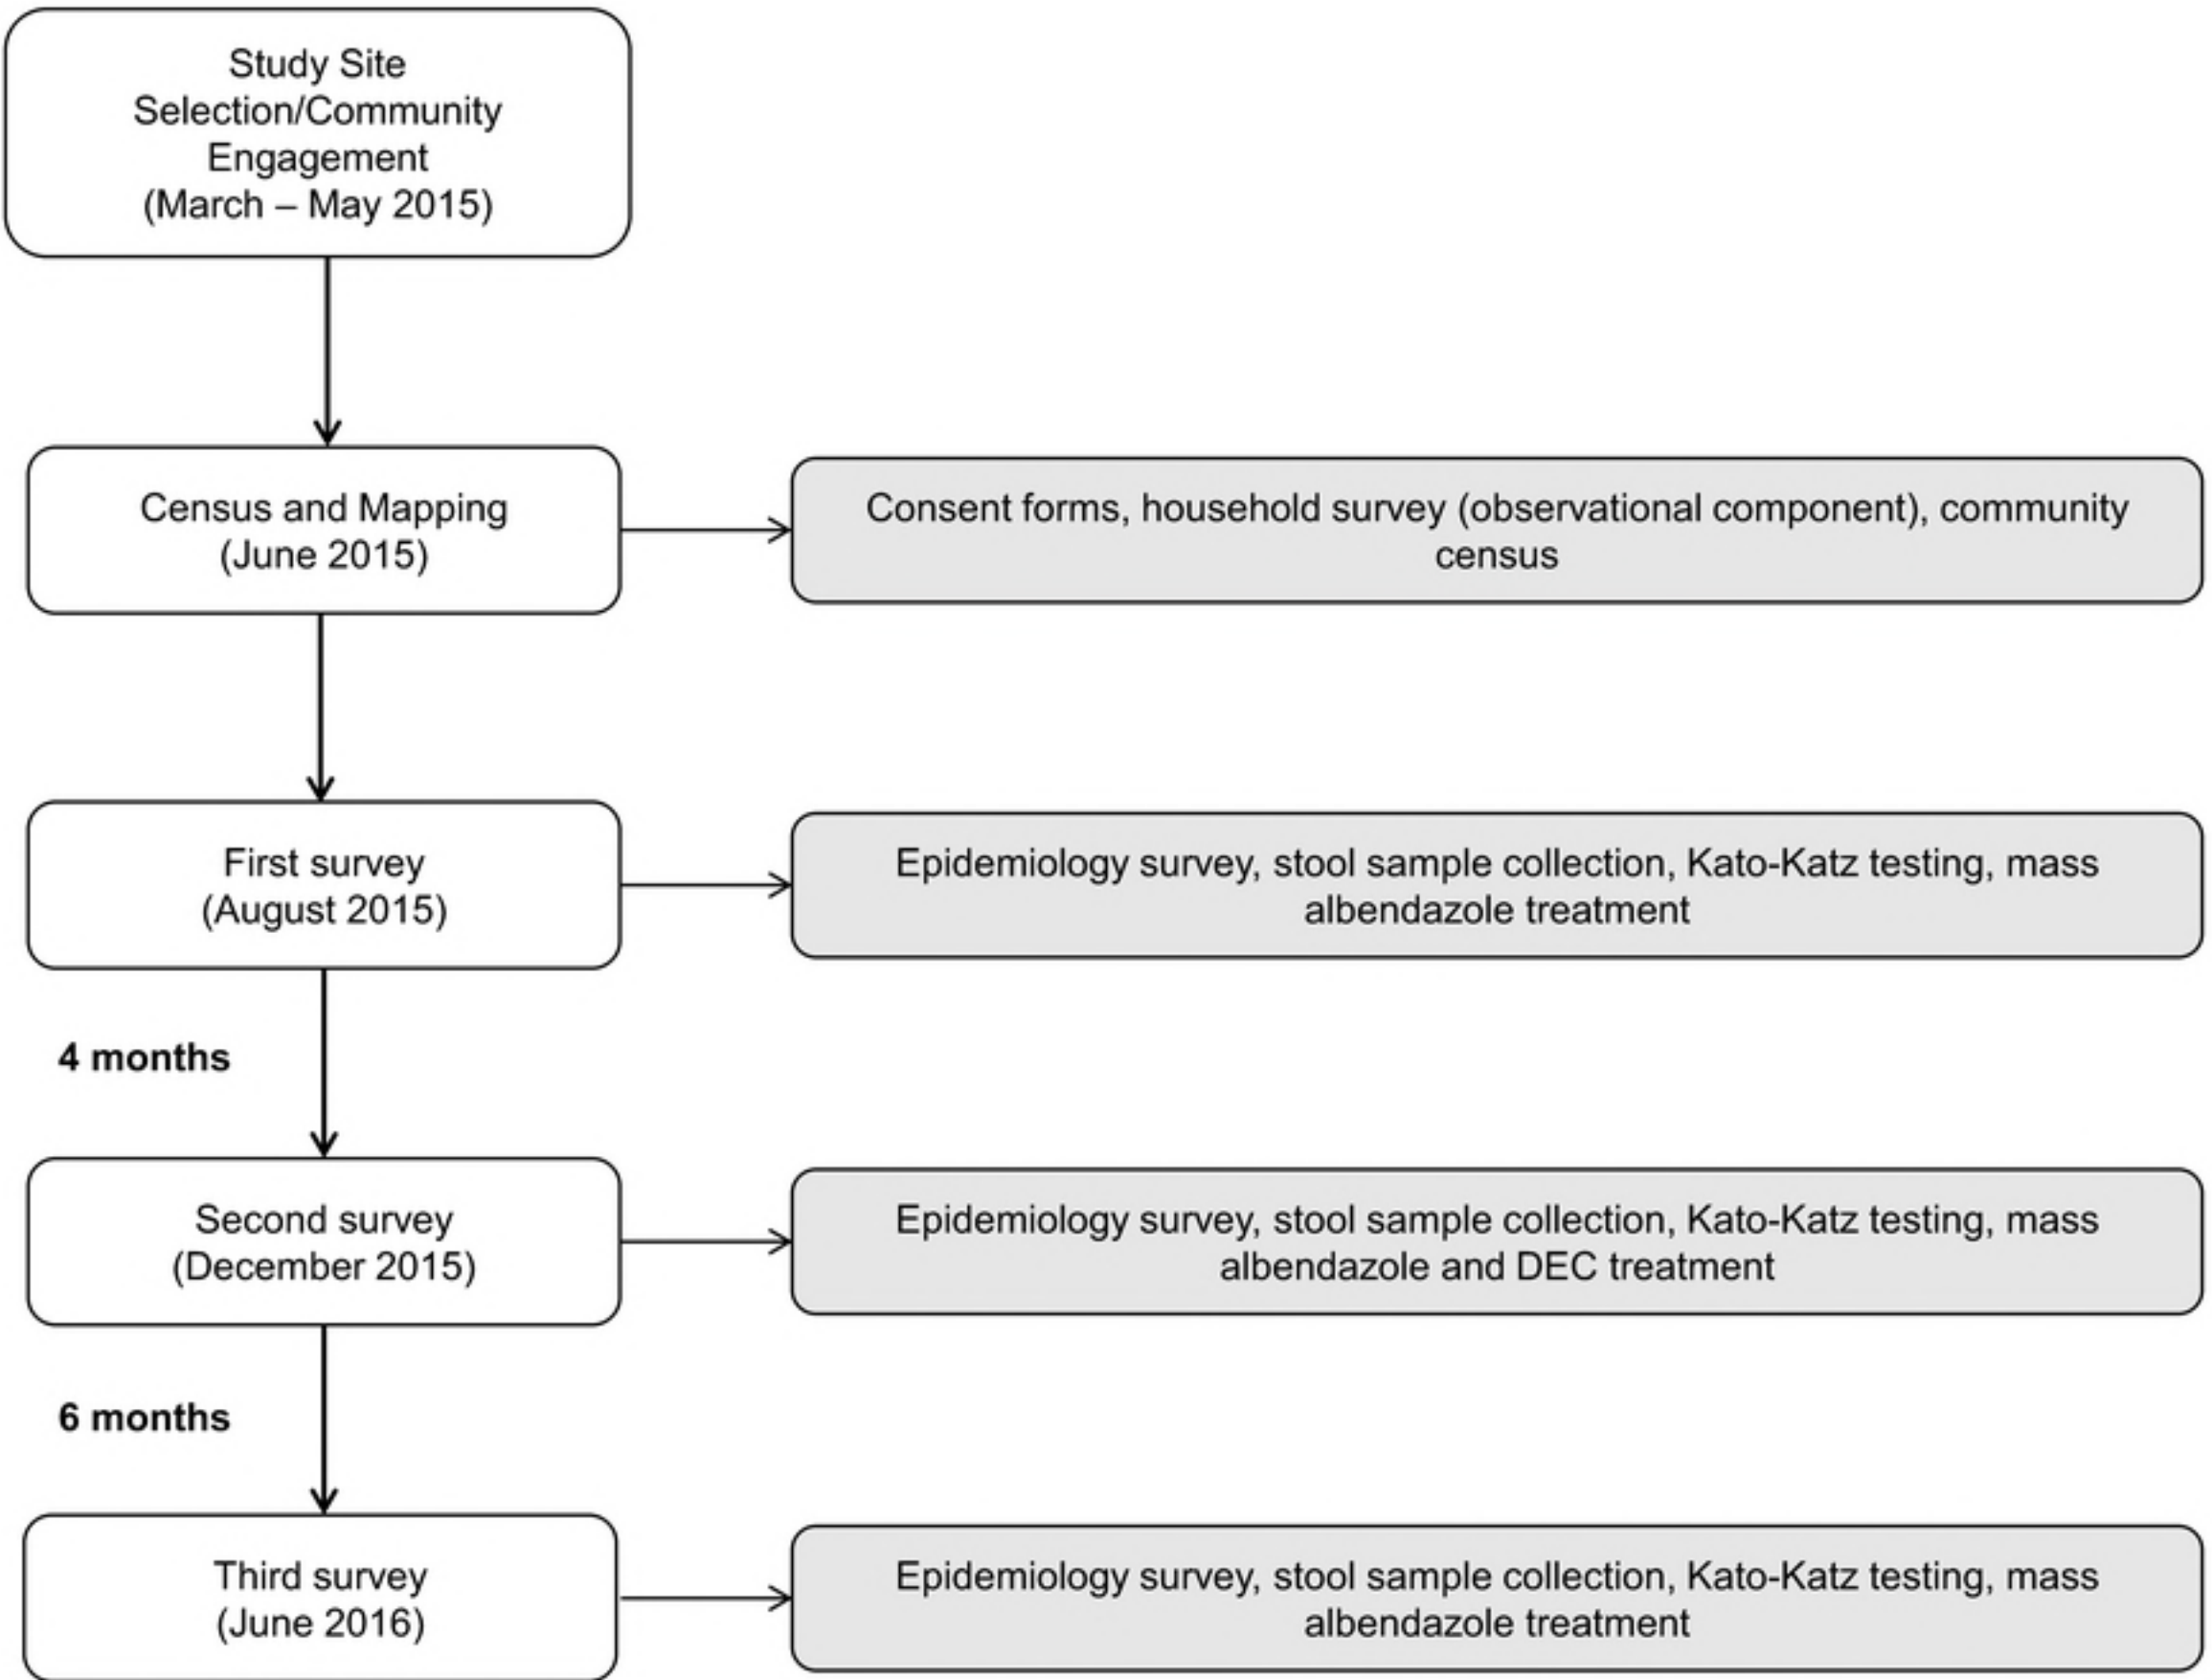

Source: https://www.biorxiv.org/content/10.1101/341677v1.full.pdf
